# Supplementary material
Source: publisher site journal article supplement (https://www.dovepress.com/article/250893)

**Supplement Fig. 1 The transfection efficiency of SPIN1 in H1299 and A549 cells.** (A-B) The mRNA and protein expression of SPIN1 in H1299 and A549 cells were detected by qRT-PCR and western blot, respectively. **P*<0.05.


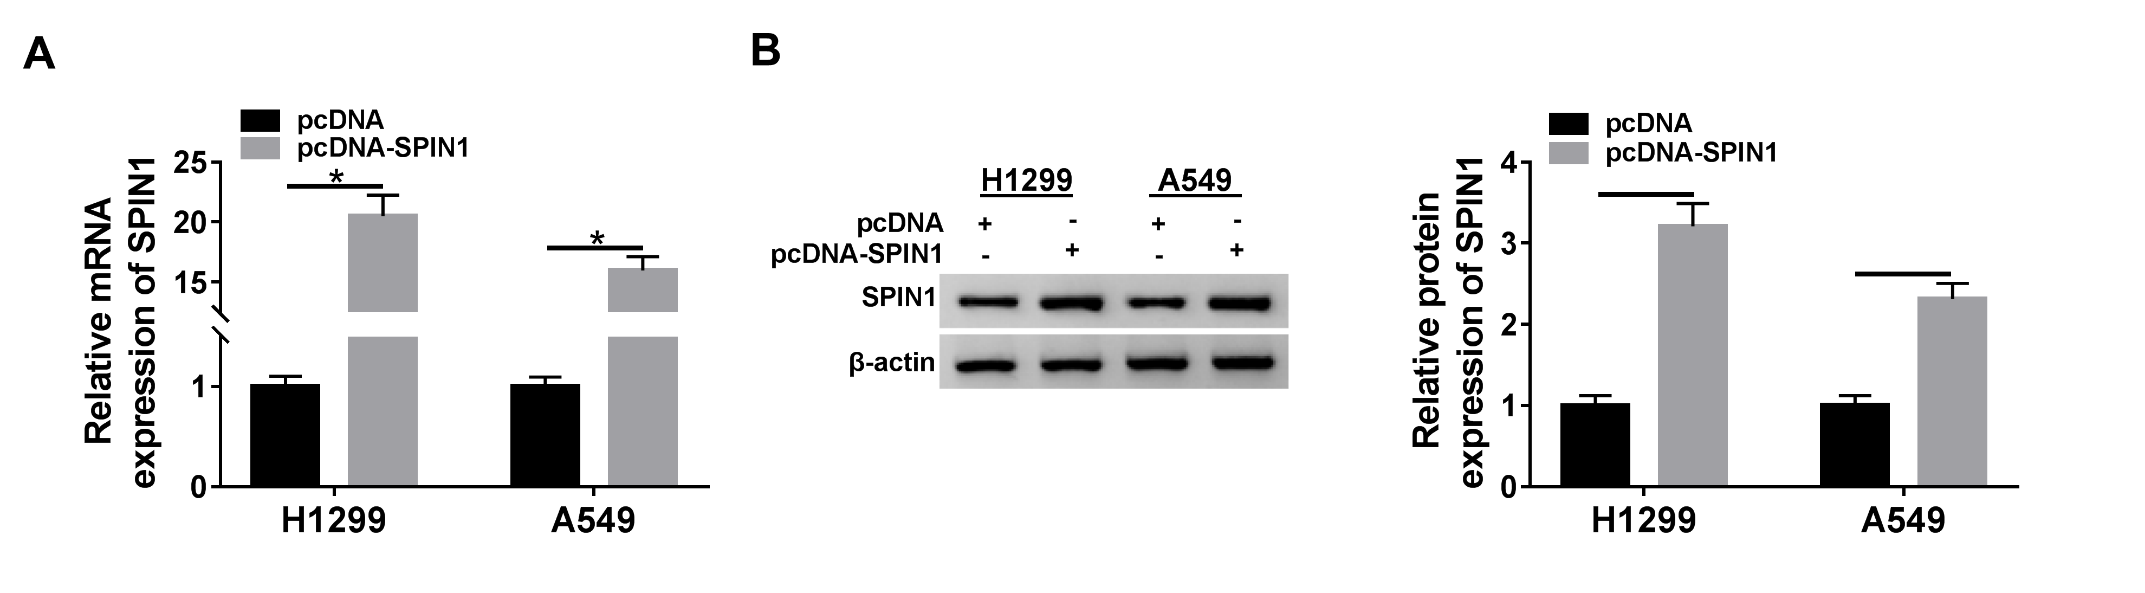

Supplement: Supplementary file 1 [file get_supplementary_file.php]
